# Supplementary material
Source: PubMed Central journal article supplement (PMC3563727)

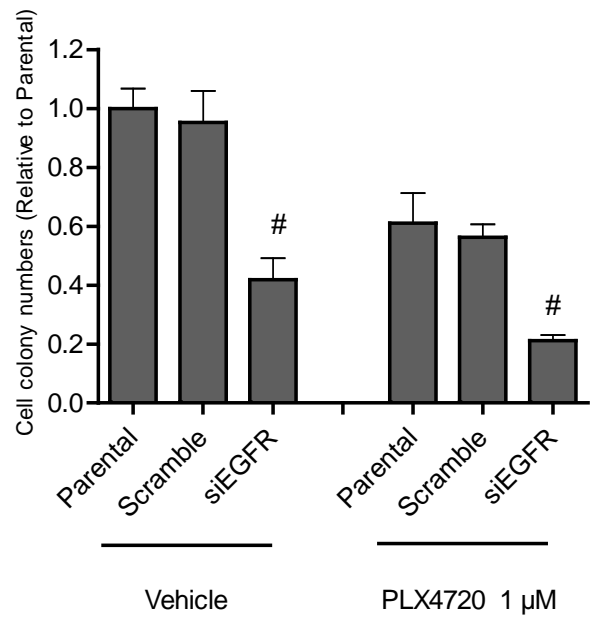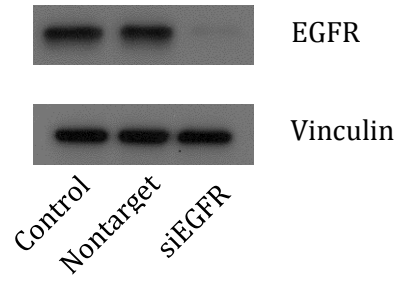

Supplement: NIHMS430904-supplement-11.pdf [file NIHMS430904-supplement-11.pdf]

**A.**

**Parental**

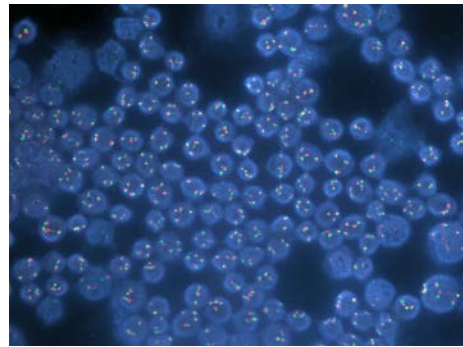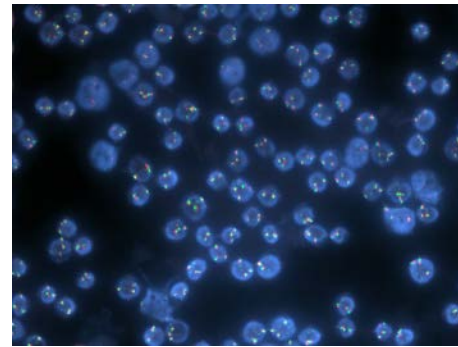

**Resistant**

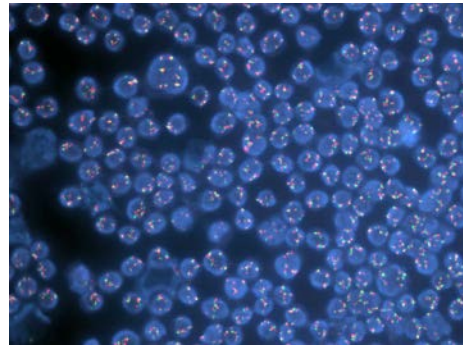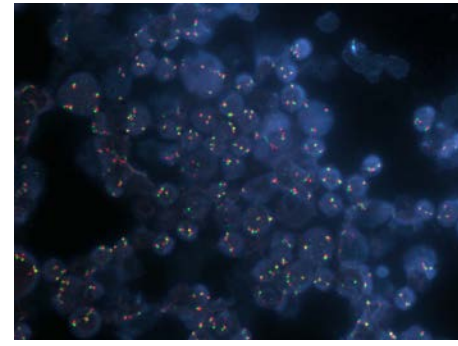

**B.**

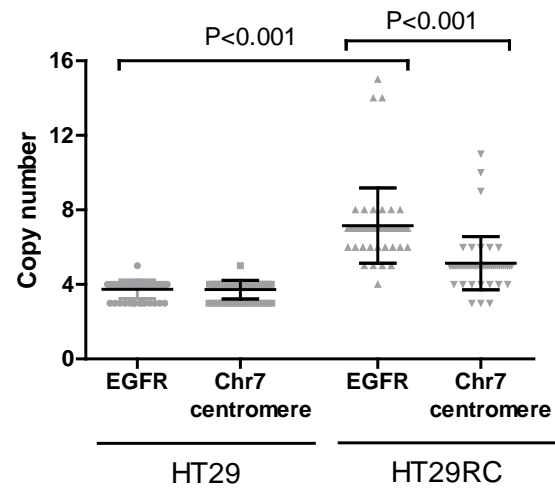

Supplement: NIHMS430904-supplement-9.pdf [file NIHMS430904-supplement-9.pdf]
